# Supplementary material
Source: PubMed Central journal article supplement (PMC7521140)
Supplement: NIHMS1602364-supplement-Data.pdf [file NIHMS1602364-supplement-Data.pdf]

Data file S1: Detected somatic mutations in donors

| Chr   | Start     | Ref | Alt       | Gene    | Type     | AA       | COSMIC ID   | CADD  | Deleterious | VAF1        | VAF2        | patientID | Engrafted | Age |
|-------|-----------|-----|-----------|---------|----------|----------|-------------|-------|-------------|-------------|-------------|-----------|-----------|-----|
| chr11 | 32456672  | G   | A         | WT1     | missense | p.R74W   | NA          | 28.7  | Yes         | 0.011304    | 0.011202    | PID_0589  | Yes       | 30  |
| chr2  | 25469138  | C   | T         | DNMT3A  | nonsense | p.W288X  | COSM1130818 | 40    | Yes         | 0.0004      | 0.001268    | PID_0489  | Yes       | 58  |
| chr2  | 25470498  | G   | T         | DNMT3A  | missense | p.R174S  | NA          | 26.5  | Yes         | 0.011218    | 0.008888    | PID_0489  | Yes       | 58  |
| chr6  | 75893069  | T   | A         | COL12A1 | missense | p.I530L  | COSM271996  | 22.1  | Yes         | 0.000843    | 0.002573    | PID_0489  | Yes       | 58  |
| chr2  | 25467428  | C   | T         | DNMT3A  | missense | p.G398R  | COSM256035  | 30    | Yes         | 0.00142     | 0.00182     | PID_0459  | Yes       | 28  |
| chr2  | 25965982  | C   | T         | ASXL2   | missense | p.R1075Q | COSM6494820 | 10.77 | No          | 0.004005    | 0.004873    | PID_0450  | Yes       | 26  |
| chr2  | 61492689  | T   | C         | USP34   | missense | p.H1874R | NA          | 22.5  | Yes         | 0.002401    | 0.002433    | PID_0450  | Yes       | 26  |
| chr2  | 25470544  | A   | C         | DNMT3A  | missense | p.I158M  | NA          | 23.6  | Yes         | 0.000541    | 0.000614    | PID_0655  | Yes       | 36  |
| chr4  | 106180927 | G   | A         | TET2    | splicing | NA       | COSM87141   | 34    | Yes         | 0.000185805 | 0.001074009 | PID_0421  | Yes       | 38  |
| chrX  | 123179113 | T   | G         | STAG2   | missense | p.Y188D  | NA          | 26.3  | Yes         | 0.00164     | 0.004084    | PID_00394 | Yes       | 40  |
| chr2  | 25469921  | T   | G         | DNMT3A  | missense | p.Q222P  | NA          | 26.1  | Yes         | 0.012781    | 0.01809     | PID_0373  | Yes       | 51  |
| chr4  | 106182995 | A   | G         | TET2    | missense | p.Y1345C | NA          | 32    | Yes         | 0.00133     | 0.001933    | PID_0373  | Yes       | 51  |
| chr16 | 30721283  | T   | TGCTTCGCC | SRCAP   | indel    | NA       | NA          | 29    | Yes         | 0.029       | 0.0258      | PID_0372  | Yes       | 23  |
| chr17 | 11556271  | T   | C         | DNAH9   | silent   | p.Y849Y  | NA          | 6.417 | No          | 0.003965    | 0.000986    | PID_0314  | Yes       | 20  |
| chr6  | 75818737  | G   | A         | COL12A1 | silent   | p.A1535A | NA          | 1.438 | No          | 0.001792    | 0.00254     | PID_0268  | Yes       | 53  |
| chr16 | 3801781   | G   | A         | CREBBP  | missense | p.T1204I | NA          | 25.5  | Yes         | 0.002441    | 0.001158    | PID_0268  | Yes       | 53  |
| chr17 | 7577094   | G   | A         | TP53    | missense | p.R150W  | COSM99925   | 25.7  | Yes         | 0.013423    | 0.017781    | PID_0268  | Yes       | 53  |
| chr2  | 25459821  | T   | G         | DNMT3A  | missense | p.H669P  | NA          | 23.3  | Yes         | 0.005147    | 0.004734    | PID_0268  | Yes       | 53  |
| chr4  | 187549458 | C   | T         | FAT1    | missense | p.D1554N | COSM1429043 | 25.8  | Yes         | 0.007042    | 0.004139    | PID_0268  | Yes       | 53  |

Data file S2: Detected somatic mutations in recipients post-HSCT after removing recipient's hematopoietic clones

| Chr   | Start     | Ref                      | Alt       | Gene    | Type     | AA       | COSMIC ID   | CADD  | VAF1     | VAF2     | Timepoint | patientID | Engrafted or New |
|-------|-----------|--------------------------|-----------|---------|----------|----------|-------------|-------|----------|----------|-----------|-----------|------------------|
| chr16 | 3801781   | G                        | A         | CREBBP  | missense | p.T1204I | NA          | 25.5  | 0.00088  | 0.001588 | D30       | PID_0268  | Engrafted        |
| chr16 | 3801781   | G                        | A         | CREBBP  | missense | p.T1204I | NA          | 25.5  | 0.001788 | 0.001573 | D100      | PID_0268  | Engrafted        |
| chr16 | 3801781   | G                        | A         | CREBBP  | missense | p.T1204I | NA          | 25.5  | 0.001285 | 0.001304 | D365      | PID_0268  | Engrafted        |
| chr17 | 7577094   | G                        | A         | TP53    | missense | p.R150W  | COSM99925   | 25.7  | 0.018132 | 0.018873 | D30       | PID_0268  | Engrafted        |
| chr17 | 7577094   | G                        | A         | TP53    | missense | p.R150W  | COSM99925   | 25.7  | 0.023088 | 0.018078 | D100      | PID_0268  | Engrafted        |
| chr17 | 7577094   | G                        | A         | TP53    | missense | p.R150W  | COSM99925   | 25.7  | 0.023448 | 0.022782 | D365      | PID_0268  | Engrafted        |
| chr2  | 25459821  | T                        | G         | DNMT3A  | missense | p.H669P  | NA          | 23.3  | 0.004792 | 0.00754  | D30       | PID_0268  | Engrafted        |
| chr2  | 25459821  | T                        | G         | DNMT3A  | missense | p.H669P  | NA          | 23.3  | 0.00522  | 0.001862 | D100      | PID_0268  | Engrafted        |
| chr2  | 25459821  | T                        | G         | DNMT3A  | missense | p.H669P  | NA          | 23.3  | 0.004636 | 0.005898 | D365      | PID_0268  | Engrafted        |
| chr2  | 25462044  | G                        | A         | DNMT3A  | missense | p.A636V  | NA          | 26.9  | 0.001243 | 0.001637 | D30       | PID_0268  | New              |
| chr2  | 25462044  | G                        | A         | DNMT3A  | missense | p.A636V  | NA          | 26.9  | 0.001319 | 0.000832 | D100      | PID_0268  | New              |
| chr6  | 75818737  | G                        | A         | COL12A1 | silent   | p.A1535A | NA          | 1.438 | 0.001169 | 0.001683 | D30       | PID_0268  | Engrafted        |
| chr6  | 75818737  | G                        | A         | COL12A1 | silent   | p.A1535A | NA          | 1.438 | 0.00164  | 0.002633 | D100      | PID_0268  | Engrafted        |
| chr6  | 75818737  | G                        | A         | COL12A1 | silent   | p.A1535A | NA          | 1.438 | 0.002188 | 0.000939 | D365      | PID_0268  | Engrafted        |
| chr4  | 106157471 | ATT                      | A         | TET2    | indel    | NA       | NA          | 27.2  | 0.004    | 0.0027   | D365      | PID_0268  | New              |
| chr4  | 187549458 | C                        | T         | FAT1    | missense | p.D1554N | COSM1429043 | 25.8  | 0.003422 | 0.006051 | D30       | PID_0268  | Engrafted        |
| chr4  | 187549458 | C                        | T         | FAT1    | missense | p.D1554N | COSM1429043 | 25.8  | 0.004722 | 0.00372  | D100      | PID_0268  | Engrafted        |
| chr4  | 187549458 | C                        | T         | FAT1    | missense | p.D1554N | COSM1429043 | 25.8  | 0.005821 | 0.005068 | D365      | PID_0268  | Engrafted        |
| chr17 | 11556271  | T                        | C         | DNAH9   | silent   | p.Y849Y  | NA          | 6.417 | 0.002639 | 0.001049 | D30       | PID_0314  | Engrafted        |
| chr17 | 11556271  | T                        | C         | DNAH9   | silent   | p.Y849Y  | NA          | 6.417 | 0.010758 | 0.001891 | D100      | PID_0314  | Engrafted        |
| chr17 | 10427979  | T                        | C         | MYH2    | missense | p.Q1660R | NA          | 23.8  | 0.001193 | 0.001827 | D365      | PID_0318  | New              |
| chr4  | 187630237 | G                        | T         | FAT1    | missense | p.Q249K  | NA          | 22.7  | 0.004705 | 0.006863 | D100      | PID_0318  | New              |
| chr4  | 187630237 | G                        | T         | FAT1    | missense | p.Q249K  | NA          | 22.7  | 0.002002 | 0.003591 | D365      | PID_0318  | New              |
| chr7  | 50450427  | C                        | T         | IKZF1   | intronic | NA       | NA          | 0.256 | 0.003137 | 0.00269  | D365      | PID_0335  | New              |
| chr7  | 135322646 | A                        | G         | NUP205  | intronic | NA       | NA          | 11.51 | 0.001635 | 0.001371 | D100      | PID_0335  | New              |
| chr9  | 139391938 | C                        | A         | NOTCH1  | missense | p.A2085S | NA          | 25.1  | 0.010538 | 0.011864 | D100      | PID_0335  | New              |
| chr9  | 139391938 | C                        | A         | NOTCH1  | missense | p.A2085S | NA          | 25.1  | 0.004486 | 0.002006 | D365      | PID_0335  | New              |
| chr17 | 7578190   | T                        | C         | TP53    | missense | p.Y88C   | COSM99718   | 29.5  | 0.006901 | 0.00515  | D100      | PID_0347  | New              |
| chr20 | 31022402  | TCACCACTGCCATAGAGAGGCGGC | T         | ASXL1   | indel    | NA       | NA          | 35    | 0.0142   | 0.0129   | D100      | PID_0360  | New              |
| chr4  | 106190797 | C                        | T         | TET2    | missense | p.R1359C | COSM41649   | 32    | 0.004008 | 0.002231 | D100      | PID_0361  | New              |
| chr2  | 25458642  | T                        | G         | DNMT3A  | missense | p.K692T  | NA          | 28.6  | 0.003823 | 0.004353 | D30       | PID_0366  | New              |
| chr2  | 25458642  | T                        | G         | DNMT3A  | missense | p.K692T  | NA          | 28.6  | 0.001147 | 0.00074  | D100      | PID_0366  | New              |
| chrX  | 44945182  | T                        | C         | KDM6A   | missense | p.V1090A | NA          | 27    | 0.001714 | 0.002526 | D365      | PID_0366  | New              |
| chr16 | 30721283  | T                        | TGCTTCGCC | SRCAP   | indel    | NA       | NA          | 29    | 0.0266   | 0.0263   | D30       | PID_0372  | Engrafted        |
| chr16 | 30721283  | T                        | TGCTTCGCC | SRCAP   | indel    | NA       | NA          | 29    | 0.033    | 0.0255   | D100      | PID_0372  | Engrafted        |
| chr16 | 30721283  | T                        | TGCTTCGCC | SRCAP   | indel    | NA       | NA          | 29    | 0.006    | 0.0037   | D365      | PID_0372  | Engrafted        |
| chrX  | 44896997  | C                        | G         | KDM6A   | intronic | NA       | NA          | 5.46  | 0.003722 | 0.003451 | D365      | PID_0372  | New              |
| chr2  | 25469921  | T                        | G         | DNMT3A  | missense | p.Q222P  | NA          | 26.1  | 0.024433 | 0.025272 | D30       | PID_0373  | Engrafted        |
| chr2  | 25469921  | T                        | G         | DNMT3A  | missense | p.Q222P  | NA          | 26.1  | 0.02903  | 0.025094 | D100      | PID_0373  | Engrafted        |

| Chr   | Start     | Ref | Alt | Gene    | Type     | AA       | COSMIC ID   | CADD  | VAF1        | VAF2        | Timepoint | patientID | Engrafted or New |
|-------|-----------|-----|-----|---------|----------|----------|-------------|-------|-------------|-------------|-----------|-----------|------------------|
| chr2  | 25469921  | T   | G   | DNMT3A  | missense | p.Q222P  | NA          | 26.1  | 0.01125     | 0.008141    | D365      | PID_0373  | Engrafted        |
| chr4  | 106182995 | A   | G   | TET2    | missense | p.Y1345C | NA          | 32    | 0.003003    | 0.002545    | D30       | PID_0373  | Engrafted        |
| chr4  | 106182995 | A   | G   | TET2    | missense | p.Y1345C | NA          | 32    | 0.001785    | 0.002803    | D100      | PID_0373  | Engrafted        |
| chr17 | 10432262  | A   | G   | MYH2    | silent   | p.T1163T | NA          | 15.78 | 0.002419    | 0.002522    | D365      | PID_0394  | New              |
| chr17 | 11701030  | T   | A   | DNAH9   | silent   | p.T2780T | NA          | 1.371 | 0.005347    | 0.005514    | D365      | PID_0394  | New              |
| chr16 | 30736081  | T   | C   | SRCAP   | missense | p.L1779P | NA          | 23.7  | 0.002611    | 0.001984    | D100      | PID_0394  | New              |
| chr16 | 30736081  | T   | C   | SRCAP   | missense | p.L1779P | NA          | 23.7  | 0.001275    | 0.002601    | D365      | PID_0394  | New              |
| chrX  | 123179113 | T   | G   | STAG2   | missense | p.Y188D  | NA          | 26.3  | 0.003225    | 0.001184    | D30       | PID_0394  | Engrafted        |
| chr4  | 24572496  | T   | G   | DHX15   | intronic | NA       | NA          | 16.29 | 0.009922    | 0.005584    | D30       | PID_0421  | New              |
| chr4  | 106156485 | TC  | T   | TET2    | indel    | NA       | NA          | 26.7  | 0.0289      | 0.02        | D365      | PID_0421  | New              |
| chr4  | 106180927 | G   | A   | TET2    | splicing | NA       | COSM87141   | 34    | 0.000737075 | 0.001845444 | D30       | PID_0421  | Engrafted        |
| chr4  | 106180927 | G   | A   | TET2    | splicing | NA       | COSM87141   | 34    | 0.000895255 | 0.001129093 | D100      | PID_0421  | Engrafted        |
| chr4  | 106180927 | G   | A   | TET2    | splicing | NA       | COSM87141   | 34    | 0.004502    | 0.004145    | D365      | PID_0421  | Engrafted        |
| chr4  | 106190860 | C   | T   | TET2    | missense | p.H1380Y | COSM87161   | 27.4  | 0.00169     | 0.001286    | D365      | PID_0421  | New              |
| chr16 | 3832811   | G   | A   | CREBBP  | stopgain | p.R445X  | COSM255965  | 38    | 0.002238    | 0.003813    | D100      | PID_0450  | New              |
| chr16 | 3832811   | G   | A   | CREBBP  | stopgain | p.R445X  | COSM255965  | 38    | 0.031195    | 0.023312    | D365      | PID_0450  | New              |
| chr17 | 11502173  | G   | T   | DNAH9   | missense | p.V120L  | NA          | 11.09 | 0.002636    | 0.003343    | D365      | PID_0450  | New              |
| chr2  | 25965982  | C   | T   | ASXL2   | missense | p.R1075Q | COSM6494820 | 10.77 | 0.005974    | 0.007519    | D30       | PID_0450  | Engrafted        |
| chr2  | 25965982  | C   | T   | ASXL2   | missense | p.R1075Q | COSM6494820 | 10.77 | 0.007112    | 0.016319    | D100      | PID_0450  | Engrafted        |
| chr2  | 25965982  | C   | T   | ASXL2   | missense | p.R1075Q | COSM6494820 | 10.77 | 0.003058    | 0.004677    | D365      | PID_0450  | Engrafted        |
| chr2  | 61492689  | T   | C   | USP34   | missense | p.H1874R | NA          | 22.5  | 0.003149    | 0.003222    | D30       | PID_0450  | Engrafted        |
| chr2  | 61492689  | T   | C   | USP34   | missense | p.H1874R | NA          | 22.5  | 0.002382    | 0.001837    | D100      | PID_0450  | Engrafted        |
| chr2  | 61492689  | T   | C   | USP34   | missense | p.H1874R | NA          | 22.5  | 0.001734    | 0.001308    | D365      | PID_0450  | Engrafted        |
| chrX  | 123181311 | C   | T   | STAG2   | stopgain | p.R259X  | COSM1598816 | 36    | 0.004316    | 0.004992    | D100      | PID_0450  | New              |
| chr9  | 139399647 | G   | A   | NOTCH1  | intronic | NA       | NA          | 1.322 | 0.001       | 0.001415    | D100      | PID_0450  | New              |
| chr9  | 139399647 | G   | A   | NOTCH1  | intronic | NA       | NA          | 1.322 | 0.001125    | 0.001466    | D365      | PID_0450  | New              |
| chr2  | 25467428  | C   | T   | DNMT3A  | missense | p.G398R  | COSM256035  | 30    | 0.001465    | 0.001914    | D30       | PID_0459  | Engrafted        |
| chr2  | 25467428  | C   | T   | DNMT3A  | missense | p.G398R  | COSM256035  | 30    | 0.001199    | 0.002875    | D100      | PID_0459  | Engrafted        |
| chr2  | 25467428  | C   | T   | DNMT3A  | missense | p.G398R  | COSM256035  | 30    | 0.000982    | 0.002632    | D365      | PID_0459  | Engrafted        |
| chr4  | 106190798 | G   | A   | TET2    | missense | p.R1359H | COSM42055   | 33    | 0.001979    | 0.004812    | D100      | PID_0467  | New              |
| chr4  | 187517780 | G   | A   | FAT1    | missense | p.A4305V | COSM6056356 | 33    | 0.006958    | 0.008668    | D365      | PID_0467  | New              |
| chr17 | 10355270  | G   | T   | MYH4    | silent   | p.V1242V | NA          | 15.61 | 0.018793    | 0.019914    | D365      | PID_0475  | New              |
| chr16 | 3778533   | T   | G   | CREBBP  | missense | p.N2134T | NA          | 22.7  | 0.000779    | 0.001114    | D30       | PID_0489  | New              |
| chr16 | 3778533   | T   | G   | CREBBP  | missense | p.N2134T | NA          | 22.7  | 0.000768    | 0.000833    | D100      | PID_0489  | New              |
| chr2  | 25469138  | C   | T   | DNMT3A  | stopgain | p.W288X  | COSM1130818 | 40    | 0.001723    | 0.001138    | D30       | PID_0489  | Engrafted        |
| chr2  | 25469138  | C   | T   | DNMT3A  | stopgain | p.W288X  | COSM1130818 | 40    | 0.000715    | 0.00153     | D100      | PID_0489  | Engrafted        |
| chr2  | 25469138  | C   | T   | DNMT3A  | stopgain | p.W288X  | COSM1130818 | 40    | 0.001764    | 0.001629    | D365      | PID_0489  | Engrafted        |
| chr2  | 25470498  | G   | T   | DNMT3A  | missense | p.R174S  | NA          | 26.5  | 0.015894    | 0.017054    | D30       | PID_0489  | Engrafted        |
| chr2  | 25470498  | G   | T   | DNMT3A  | missense | p.R174S  | NA          | 26.5  | 0.011207    | 0.01087     | D100      | PID_0489  | Engrafted        |
| chr2  | 25470498  | G   | T   | DNMT3A  | missense | p.R174S  | NA          | 26.5  | 0.011979    | 0.007639    | D365      | PID_0489  | Engrafted        |
| chr6  | 75893069  | T   | A   | COL12A1 | missense | p.I530L  | COSM271996  | 22.1  | 0.002051    | 0.003665    | D100      | PID_0489  | Engrafted        |

| Chr   | Start    | Ref | Alt | Gene    | Type     | AA       | COSMIC ID | CADD  | VAF1     | VAF2     | Timepoint | patientID | Engrafted or New |
|-------|----------|-----|-----|---------|----------|----------|-----------|-------|----------|----------|-----------|-----------|------------------|
| chr20 | 31022592 | CG  | C   | ASXL1   | indel    | NA       | NA        | 34    | 0.0062   | 0.0053   | D365      | PID_0495  | New              |
| chr17 | 7681670  | C   | A   | DNAH2   | silent   | p.G1808G | NA        | 5.337 | 0.004119 | 0.004819 | D100      | PID_0589  | New              |
| chr17 | 7681670  | C   | A   | DNAH2   | silent   | p.G1808G | NA        | 5.337 | 0.008886 | 0.008291 | D365      | PID_0589  | New              |
| chr19 | 13445165 | C   | T   | CACNA1A | intronic | NA       | NA        | 12.07 | 0.004625 | 0.001711 | D365      | PID_0589  | New              |
| chr11 | 32456672 | G   | A   | WT1     | missense | p.R74W   | NA        | 28.7  | 0.013294 | 0.015119 | D30       | PID_0589  | Engrafted        |
| chr11 | 32456672 | G   | A   | WT1     | missense | p.R74W   | NA        | 28.7  | 0.009875 | 0.009044 | D100      | PID_0589  | Engrafted        |
| chr11 | 32456672 | G   | A   | WT1     | missense | p.R74W   | NA        | 28.7  | 0.01129  | 0.009187 | D365      | PID_0589  | Engrafted        |
| chr2  | 25470544 | A   | C   | DNMT3A  | missense | p.I158M  | NA        | 23.6  | 0.00058  | 0.000579 | D100      | PID_0655  | Engrafted        |

Data file S3: Shared variants in pre-HSCT and post-HSCT recipient samples due to incomplete clearance of recipient's hematopoietic clones post-HSCT.

| Chr   | Start     | Ref | Alt | Gene   | Type     | AA       | COSMIC ID    | VAF1     | VAF2     | Timepoint | patientID |
|-------|-----------|-----|-----|--------|----------|----------|--------------|----------|----------|-----------|-----------|
| chr18 | 7002407   | A   | C   | LAMA1  | intronic | NA       | NA           | 0.434713 | 0.356371 | Pre       | PID_0576  |
| chr18 | 7002407   | A   | C   | LAMA1  | intronic | NA       | NA           | 0.021635 | 0.024166 | D30       | PID_0576  |
| chr18 | 7002407   | A   | C   | LAMA1  | intronic | NA       | NA           | 0.013414 | 0.018904 | D100      | PID_0576  |
| chr7  | 135285707 | G   | A   | NUP205 | silent   | p.V430V  | COSM40403    | 0.505976 | 0.512114 | Pre       | PID_0499  |
| chr7  | 135285707 | G   | A   | NUP205 | silent   | p.V430V  | COSM40403    | 0.019954 | 0.021033 | D30       | PID_0499  |
| chr7  | 135285707 | G   | A   | NUP205 | silent   | p.V430V  | COSM40403    | 0.022706 | 0.025451 | D100      | PID_0499  |
| chr11 | 32456726  | G   | A   | WT1    | missense | p.R56W   | NA           | 0.404366 | 0.403446 | Pre       | PID_0495  |
| chr11 | 32456726  | G   | A   | WT1    | missense | p.R56W   | NA           | 0.000908 | 0.000609 | D30       | PID_0495  |
| chr16 | 30736222  | C   | T   | SRCAP  | missense | p.S1826L | COSM5850742  | 0.507346 | 0.496049 | Pre       | PID_0495  |
| chr16 | 30736222  | C   | T   | SRCAP  | missense | p.S1826L | COSM5850742  | 0.04389  | 0.039401 | D30       | PID_0495  |
| chr16 | 30736222  | C   | T   | SRCAP  | missense | p.S1826L | COSM5850742  | 0.006037 | 0.003924 | D100      | PID_0495  |
| chr17 | 11550421  | G   | A   | DNAH9  | missense | p.R668Q  | COSM1236009  | 0.910698 | 0.90111  | Pre       | PID_0495  |
| chr17 | 11550421  | G   | A   | DNAH9  | missense | p.R668Q  | COSM1236009  | 0.042462 | 0.055456 | D30       | PID_0495  |
| chr17 | 7669761   | G   | A   | DNAH2  | missense | p.E1213K | NA           | 0.912955 | 0.915971 | Pre       | PID_0495  |
| chr17 | 7669761   | G   | A   | DNAH2  | missense | p.E1213K | NA           | 0.052973 | 0.051185 | D30       | PID_0495  |
| chr8  | 128750945 | C   | T   | MYC    | missense | p.S161L  | COSM1454792  | 0.40811  | 0.402829 | Pre       | PID_0495  |
| chr8  | 128750945 | C   | T   | MYC    | missense | p.S161L  | COSM1454792  | 0.002216 | 0.001834 | D30       | PID_0495  |
| chr9  | 134072817 | C   | G   | NUP214 | silent   | p.T138T  | NA           | 0.507812 | 0.506112 | Pre       | PID_0495  |
| chr9  | 134072817 | C   | G   | NUP214 | silent   | p.T138T  | NA           | 0.042121 | 0.039321 | D30       | PID_0495  |
| chr9  | 134072817 | C   | G   | NUP214 | silent   | p.T138T  | NA           | 0.001785 | 0.004946 | D100      | PID_0495  |
| chr17 | 7697727   | G   | A   | DNAH2  | intronic | NA       | NA           | 0.491119 | 0.492356 | Pre       | PID_0489  |
| chr17 | 7697727   | G   | A   | DNAH2  | intronic | NA       | NA           | 0.001426 | 0.00106  | D30       | PID_0489  |
| chr9  | 134074118 | G   | C   | NUP214 | missense | p.S572T  | NA           | 0.507816 | 0.517495 | Pre       | PID_0489  |
| chr9  | 134074118 | G   | C   | NUP214 | missense | p.S572T  | NA           | 0.001387 | 0.001787 | D30       | PID_0489  |
| chr17 | 7577644   | C   | G   | TP53   | intronic | NA       | COSN26958754 | 0.507881 | 0.508418 | Pre       | PID_0475  |
| chr17 | 7577644   | C   | G   | TP53   | intronic | NA       | COSN26958754 | 0.000881 | 0.000709 | D30       | PID_0475  |
| chr5  | 180057843 | A   | G   | FLT4   | intronic | NA       | NA           | 0.519392 | 0.502796 | Pre       | PID_0475  |
| chr5  | 180057843 | A   | G   | FLT4   | intronic | NA       | NA           | 0.001027 | 0.001216 | D30       | PID_0475  |
| chr13 | 28608020  | G   | C   | FLT3   | intronic | NA       | NA           | 0.505227 | 0.483484 | Pre       | PID_0459  |

| Chr   | Start     | Ref | Alt | Gene    | Type     | AA       | COSMIC ID   | VAF1     | VAF2     | Timepoint | patientID |
|-------|-----------|-----|-----|---------|----------|----------|-------------|----------|----------|-----------|-----------|
| chr13 | 28608020  | G   | C   | FLT3    | intronic | NA       | NA          | 0.032958 | 0.028085 | D30       | PID_0459  |
| chr13 | 28608020  | G   | C   | FLT3    | intronic | NA       | NA          | 0.056743 | 0.058917 | D100      | PID_0459  |
| chr4  | 106180845 | G   | T   | TET2    | missense | p.W1291C | COSM4383925 | 0.175306 | 0.185252 | Pre       | PID_0459  |
| chr4  | 106180845 | G   | T   | TET2    | missense | p.W1291C | COSM4383925 | 0.007234 | 0.00947  | D30       | PID_0459  |
| chr4  | 106180845 | G   | T   | TET2    | missense | p.W1291C | COSM4383925 | 0.004535 | 0.003971 | D100      | PID_0459  |
| chr4  | 106157845 | C   | T   | TET2    | nonsense | p.Q916X  | COSM3733079 | 0.171096 | 0.191542 | Pre       | PID_0459  |
| chr4  | 106157845 | C   | T   | TET2    | nonsense | p.Q916X  | COSM3733079 | 0.004234 | 0.003035 | D30       | PID_0459  |
| chr4  | 106157845 | C   | T   | TET2    | nonsense | p.Q916X  | COSM3733079 | 0.007722 | 0.004722 | D100      | PID_0459  |
| chr4  | 55575669  | G   | A   | KIT     | missense | p.V399I  | COSM51494   | 0.485625 | 0.495795 | Pre       | PID_0459  |
| chr4  | 55575669  | G   | A   | KIT     | missense | p.V399I  | COSM51494   | 0.029492 | 0.03654  | D30       | PID_0459  |
| chr4  | 55575669  | G   | A   | KIT     | missense | p.V399I  | COSM51494   | 0.05834  | 0.047988 | D100      | PID_0459  |
| chr5  | 180057876 | C   | T   | FLT4    | intronic | NA       | NA          | 0.509449 | 0.501632 | Pre       | PID_0459  |
| chr5  | 180057876 | C   | T   | FLT4    | intronic | NA       | NA          | 0.033549 | 0.029598 | D30       | PID_0459  |
| chr5  | 180057876 | C   | T   | FLT4    | intronic | NA       | NA          | 0.063978 | 0.057464 | D100      | PID_0459  |
| chr5  | 180046495 | A   | C   | FLT4    | intronic | NA       | NA          | 0.530321 | 0.566294 | Pre       | PID_0459  |
| chr5  | 180046495 | A   | C   | FLT4    | intronic | NA       | NA          | 0.028811 | 0.03513  | D30       | PID_0459  |
| chr5  | 180046495 | A   | C   | FLT4    | intronic | NA       | NA          | 0.067174 | 0.070913 | D100      | PID_0459  |
| chr3  | 128200072 | C   | T   | GATA2   | silent   | p.A397A  | COSM5019736 | 0.501648 | 0.504831 | Pre       | PID_0467  |
| chr3  | 128200072 | C   | T   | GATA2   | silent   | p.A397A  | COSM5019736 | 0.150707 | 0.155821 | D30       | PID_0467  |
| chr6  | 138632652 | G   | A   | ARFGEF3 | intronic | NA       | NA          | 0.001567 | 0.001827 | Pre       | PID_0467  |
| chr6  | 138632652 | G   | A   | ARFGEF3 | intronic | NA       | NA          | 0.001096 | 0.000721 | D30       | PID_0467  |
| chr16 | 15814717  | C   | T   | MYH11   | silent   | p.K1590K | COSM5020106 | 0.499401 | 0.496203 | Pre       | PID_0437  |
| chr16 | 15814717  | C   | T   | MYH11   | silent   | p.K1590K | COSM5020106 | 0.002947 | 0.003508 | D100      | PID_0437  |
| chr16 | 15814717  | C   | T   | MYH11   | silent   | p.K1590K | COSM5020106 | 0.00276  | 0.003484 | D360      | PID_0437  |
| chrX  | 44922982  | C   | G   | KDM6A   | missense | p.L536V  | NA          | 0.509905 | 0.497262 | Pre       | PID_0437  |
| chrX  | 44922982  | C   | G   | KDM6A   | missense | p.L536V  | NA          | 0.001176 | 0.002106 | D30       | PID_0437  |
| chrX  | 44922982  | C   | G   | KDM6A   | missense | p.L536V  | NA          | 0.002725 | 0.001689 | D100      | PID_0437  |
| chr4  | 106156384 | G   | A   | TET2    | missense | p.G429R  | COSM219042  | 0.493444 | 0.49112  | Pre       | PID_0409  |
| chr4  | 106156384 | G   | A   | TET2    | missense | p.G429R  | COSM219042  | 0.00807  | 0.008017 | D30       | PID_0409  |
| chr4  | 106156384 | G   | A   | TET2    | missense | p.G429R  | COSM219042  | 0.013121 | 0.011373 | D100      | PID_0409  |
| chr16 | 3778424   | T   | G   | CREBBP  | missense | p.Q2170H | COSM96470   | 0.476022 | 0.503146 | Pre       | PID_0409  |
| chr16 | 3778424   | T   | G   | CREBBP  | missense | p.Q2170H | COSM96470   | 0.008232 | 0.008722 | D30       | PID_0409  |

| Chr   | Start     | Ref | Alt | Gene   | Type     | AA       | COSMIC ID   | VAF1     | VAF2     | Timepoint | patientID |
|-------|-----------|-----|-----|--------|----------|----------|-------------|----------|----------|-----------|-----------|
| chr16 | 3778424   | T   | G   | CREBBP | missense | p.Q2170H | COSM96470   | 0.01268  | 0.015275 | D100      | PID_0409  |
| chr16 | 3779594   | C   | T   | CREBBP | silent   | p.V1780V | COSM5019155 | 0.489053 | 0.493702 | Pre       | PID_0409  |
| chr16 | 3779594   | C   | T   | CREBBP | silent   | p.V1780V | COSM5019155 | 0.008906 | 0.010031 | D30       | PID_0409  |
| chr16 | 3779594   | C   | T   | CREBBP | silent   | p.V1780V | COSM5019155 | 0.01582  | 0.015028 | D100      | PID_0409  |
| chr16 | 30727853  | C   | G   | SRCAP  | intronic | NA       | NA          | 0.48963  | 0.496588 | Pre       | PID_0394  |
| chr16 | 30727853  | C   | G   | SRCAP  | intronic | NA       | NA          | 0.03362  | 0.032133 | D30       | PID_0394  |
| chr17 | 7684131   | C   | T   | DNAH2  | intronic | NA       | NA          | 0.014319 | 0.012846 | D30       | PID_0361  |
| chr17 | 7684131   | C   | T   | DNAH2  | intronic | NA       | NA          | 0.503446 | 0.507958 | Pre       | PID_0361  |
| chr20 | 31024704  | G   | A   | ASXL1  | missense | p.G1397S | COSM133033  | 0.016931 | 0.018797 | D30       | PID_0361  |
| chr20 | 31024704  | G   | A   | ASXL1  | missense | p.G1397S | COSM133033  | 0.498835 | 0.498557 | Pre       | PID_0361  |
| chrX  | 39937244  | A   | C   | BCOR   | intronic | NA       | NA          | 0.011781 | 0.015437 | D30       | PID_0361  |
| chrX  | 39937244  | A   | C   | BCOR   | intronic | NA       | NA          | 1        | 0.998739 | Pre       | PID_0361  |
| chr2  | 209113113 | G   | A   | IDH1   | missense | p.R132C  | COSM28747   | 0.009563 | 0.005514 | Pre       | PID_0360  |
| chr2  | 209113113 | G   | A   | IDH1   | missense | p.R132C  | COSM28747   | 0.032294 | 0.034172 | D100      | PID_0360  |
| chr20 | 31024260  | A   | G   | ASXL1  | missense | p.M1249V | COSM6498418 | 0.513097 | 0.490742 | Pre       | PID_0360  |
| chr20 | 31024260  | A   | G   | ASXL1  | missense | p.M1249V | COSM6498418 | 0.039568 | 0.033524 | D30       | PID_0360  |
| chr20 | 31024260  | A   | G   | ASXL1  | missense | p.M1249V | COSM6498418 | 0.057228 | 0.074445 | D100      | PID_0360  |
| chr20 | 31022444  | G   | C   | ASXL1  | silent   | p.G643G  | NA          | 0.609968 | 0.650678 | Pre       | PID_0360  |
| chr20 | 31022444  | G   | C   | ASXL1  | silent   | p.G643G  | NA          | 0.064838 | 0.070318 | D30       | PID_0360  |
| chr20 | 31022444  | G   | C   | ASXL1  | silent   | p.G643G  | NA          | 0.094106 | 0.115806 | D100      | PID_0360  |
| chr21 | 36252865  | C   | T   | RUNX1  | missense | p.R139Q  | COSM36055   | 0.005559 | 0.003582 | Pre       | PID_0360  |
| chr21 | 36252865  | C   | T   | RUNX1  | missense | p.R139Q  | COSM36055   | 0.028548 | 0.027494 | D100      | PID_0360  |
| chr3  | 47125604  | A   | G   | SETD2  | missense | p.M1845T | NA          | 0.501668 | 0.513251 | Pre       | PID_0360  |
| chr3  | 47125604  | A   | G   | SETD2  | missense | p.M1845T | NA          | 0.03326  | 0.031476 | D30       | PID_0360  |
| chr3  | 47125604  | A   | G   | SETD2  | missense | p.M1845T | NA          | 0.066519 | 0.069635 | D100      | PID_0360  |
| chr7  | 148523590 | C   | T   | EZH2   | missense | p.R249Q  | COSM1449004 | 0.00326  | 0.004129 | Pre       | PID_0360  |
| chr7  | 148523590 | C   | T   | EZH2   | missense | p.R249Q  | COSM1449004 | 0.014485 | 0.015988 | D100      | PID_0360  |
| chr16 | 30735348  | C   | G   | SRCAP  | missense | p.P1535A | NA          | 0.491278 | 0.505079 | Pre       | PID_0347  |
| chr16 | 30735348  | C   | G   | SRCAP  | missense | p.P1535A | NA          | 0.013502 | 0.012958 | D30       | PID_0347  |
| chr16 | 30735348  | C   | G   | SRCAP  | missense | p.P1535A | NA          | 0.02768  | 0.030115 | D100      | PID_0347  |
| chr17 | 7578535   | T   | C   | TP53   | missense | p.K93R   | COSM3388223 | 0.002619 | 0.002549 | Pre       | PID_0347  |
| chr17 | 7578535   | T   | C   | TP53   | missense | p.K93R   | COSM3388223 | 0.003423 | 0.003649 | D30       | PID_0347  |

| Chr   | Start     | Ref | Alt | Gene   | Type     | AA       | COSMIC ID   | VAF1     | VAF2     | Timepoint | patientID |
|-------|-----------|-----|-----|--------|----------|----------|-------------|----------|----------|-----------|-----------|
| chr17 | 7578406   | C   | T   | TP53   | missense | p.R43H   | COSM10648   | 0.001863 | 0.000881 | Pre       | PID_0347  |
| chr17 | 7578406   | C   | T   | TP53   | missense | p.R43H   | COSM10648   | 0.002412 | 0.001305 | D30       | PID_0347  |
| chr17 | 7578406   | C   | T   | TP53   | missense | p.R43H   | COSM10648   | 0.001066 | 0.002532 | D100      | PID_0347  |
| chr17 | 7578263   | G   | A   | TP53   | nonsense | p.R64X   | COSM3378446 | 0.040574 | 0.037321 | Pre       | PID_0347  |
| chr17 | 7578263   | G   | A   | TP53   | nonsense | p.R64X   | COSM3378446 | 0.016537 | 0.012518 | D30       | PID_0347  |
| chr17 | 7578263   | G   | A   | TP53   | nonsense | p.R64X   | COSM3378446 | 0.052481 | 0.039326 | D100      | PID_0347  |
| chr2  | 198266834 | T   | C   | SF3B1  | missense | p.K700E  | COSM84677   | 0.029823 | 0.030639 | Pre       | PID_0347  |
| chr2  | 198266834 | T   | C   | SF3B1  | missense | p.K700E  | COSM84677   | 0.01055  | 0.007808 | D30       | PID_0347  |
| chr2  | 198266834 | T   | C   | SF3B1  | missense | p.K700E  | COSM84677   | 0.043792 | 0.031544 | D100      | PID_0347  |
| chr17 | 29677184  | C   | T   | NF1    | intronic | NA       | NA          | 0.014122 | 0.013542 | D30       | PID_0335  |
| chr17 | 29677184  | C   | T   | NF1    | intronic | NA       | NA          | 0.501188 | 0.487533 | Pre       | PID_0335  |
| chr11 | 32417962  | A   | G   | WT1    | intronic | NA       | COSM6494031 | 0.506841 | 0.483758 | Pre       | PID_0268  |
| chr11 | 32417962  | A   | G   | WT1    | intronic | NA       | COSM6494031 | 0.00479  | 0.005205 | D30       | PID_0268  |
| chr11 | 32417962  | A   | G   | WT1    | intronic | NA       | COSM6494031 | 0.00144  | 0.001023 | D100      | PID_0268  |
| chr17 | 7727547   | C   | T   | DNAH2  | missense | p.R3863C | NA          | 0.497982 | 0.518192 | Pre       | PID_0268  |
| chr17 | 7727547   | C   | T   | DNAH2  | missense | p.R3863C | NA          | 0.004903 | 0.00291  | D30       | PID_0268  |
| chr17 | 7727547   | C   | T   | DNAH2  | missense | p.R3863C | NA          | 0.002456 | 0.002404 | D100      | PID_0268  |
| chr2  | 25991798  | A   | G   | ASXL2  | intronic | NA       | NA          | 0.559502 | 0.508356 | Pre       | PID_0268  |
| chr2  | 25991798  | A   | G   | ASXL2  | intronic | NA       | NA          | 0.004492 | 0.003673 | D30       | PID_0268  |
| chr2  | 25991798  | A   | G   | ASXL2  | intronic | NA       | NA          | 0.003618 | 0.000983 | D100      | PID_0268  |
| chr9  | 139399343 | C   | T   | NOTCH1 | silent   | p.L1600L | NA          | 0.506623 | 0.51215  | Pre       | PID_0268  |
| chr9  | 139399343 | C   | T   | NOTCH1 | silent   | p.L1600L | NA          | 0.005394 | 0.003518 | D30       | PID_0268  |
| chr9  | 139399343 | C   | T   | NOTCH1 | silent   | p.L1600L | NA          | 0.003461 | 0.002481 | D100      | PID_0268  |



Data file S4: Analysis of recipient clinical outcomes in relation to engraftment of donor-derived mutations

| Mutation engraftment variable                           | Disease characteristic                  | Test                                                | p-value |
|---------------------------------------------------------|-----------------------------------------|-----------------------------------------------------|---------|
| Pathogenic donor mutation                               | Acute GvHD                              | Fisher's Exact test                                 | 0.54    |
|                                                         | Cytopenia                               | Fisher's Exact test                                 | 0.24    |
|                                                         | Duration of cytopenia                   | Wilcoxon rank-sum test                              | 0.28    |
|                                                         | Cumulative incidence of of chronic GvHD | Fine-Gray subdistribution hazard model, Gray's test | 0.22    |
|                                                         | Leukemia Free Survival                  | Kaplan-Meier model, log-rank test                   | 0.57    |
|                                                         | CMV reactivation                        | Fisher's Exact test                                 | 0.092   |
|                                                         | Cardiac event                           | Fisher's Exact test                                 | 0.99    |
|                                                         | Mixed chimerism                         | Repeated measure logistic regression                | 0.23    |
|                                                         | Neutrophil engraftment                  | No test, all engrafted                              | -       |
| Persistent donor engraftment                            | Acute GvHD                              | Fisher's Exact test                                 | 0.23    |
|                                                         | Cytopenia                               | Fisher's Exact test                                 | 0.21    |
|                                                         | Duration of cytopenia                   | Wilcoxon rank-sum test                              | 0.054   |
|                                                         | Cumulative incidence of of chronic GvHD | Fine-Gray subdistribution hazard model, Gray's test | 0.23    |
|                                                         | Leukemia Free Survival                  | Kaplan-Meier model, log-rank test                   | 0.72    |
|                                                         | CMV reactivation                        | Fisher's Exact test                                 | 0.099   |
|                                                         | Cardiac event                           | Fisher's Exact test                                 | 0.57    |
|                                                         | Mixed chimerism                         | Repeated measure logistic regression                | 0.33    |
|                                                         | Neutrophil engraftment                  | No test, all engrafted                              | -       |
| Persistent engraftment of COSMIC-related donor mutation | Acute GvHD                              | Fisher's Exact test                                 | 0.5     |
|                                                         | Cytopenia                               | Fisher's Exact test                                 | 0.99    |
|                                                         | Duration of cytopenia                   | Wilcoxon rank-sum test                              | 0.2     |
|                                                         | Cumulative incidence of of chronic GvHD | Fine-Gray subdistribution hazard model, Gray's test | 0.14    |
|                                                         | Leukemia Free Survival                  | Kaplan-Meier model, log-rank test                   | 0.43    |
|                                                         | CMV reactivation                        | Fisher's Exact test                                 | 0.33    |
|                                                         | Cardiac event                           | Fisher's Exact test                                 | 0.55    |
|                                                         | Mixed chimerism                         | Repeated measure logistic regression                | 0.65    |
|                                                         | Neutrophil engraftment                  | No test, all engrafted                              | -       |

Data file S5: Recurrently mutated genes in adult and pediatric AML

|           |        |         |        |         |       |         |        |
|-----------|--------|---------|--------|---------|-------|---------|--------|
| Adult     | ABL1   | ASXL1   | ATRX   | BCOR    | BRAF  | CALR    | CBL    |
|           | CBLB   | CBLC    | CDKN2A | CEBPA   | CSF3R | DNMT3A  | ETV6   |
|           | EZH2   | FBXW7   | FLT3   | GATA1   | GATA2 | GNAS    | HRAS   |
|           | IDH1   | IDH2    | IKZF1  | JAK2    | JAK3  | KDM6A   | KIT    |
|           | KRAS   | MPL     | MYD88  | NOTCH1  | NPM1  | NRAS    | PDGFRA |
|           | PHF6   | PTEN    | PTPN11 | RAD21   | RUNX1 | SETBP1  | SF3B1  |
|           | SMC1A  | STAG2   | TET2   | TP53    | U2AF1 | WT1     | ZRSR2  |
| Pediatric | AFF3   | ARFGEF3 | ASXL2  | CACNA1A | CCND3 | COL12A1 | CREBBP |
|           | DHX15  | DNAH2   | DNAH9  | FAT1    | FLT4  | KMT2A   | LAMA1  |
|           | MED23  | MFSD11  | MYC    | MYH11   | MYH2  | MYH4    | NCOR1  |
|           | NF1    | NUP205  | NUP214 | RELN    | SETD2 | SPI1    | SRCAP  |
|           | TRIM24 | TRRAP   | USP34  |         |       |         |        |

## Data file S6: ddPCR probe sequences

| Mutation       | Probe sequence                                                                                                                           |
|----------------|------------------------------------------------------------------------------------------------------------------------------------------|
| STAG2 p.R259*  | CATTAAATATGGATAATACACAAAGACAATATGAAGCAGAACG<br>GAATAAAATGATTGGAAAA[C/T]GAGCCAATGAGAGGCTAGA<br>ACTCCTGCTACAAAAGCGGAAAGAGGTAAACTTTTATATTGA |
| DNAH2 p.G1808G | CACTGACCACGGCATTGCACCTGCACCGAGGGGGCTCCCCCA<br>AAGGCCCTGCAGGCACAGG[C/A]AAGACCGAGACCGTCAAGG<br>ACCTGGGCAAGGCCCTGGGCATATATGTCATTGTGGTCAACT  |
| CREBBP p.R445X | AGGGCAACAGAATGCCACTTCTTTAAGTAACCCAAATCCCATA<br>GACCCAGCTCCATGCAG[C/T]GAGCCTATGCTGCTCTCGGACT<br>CCCCTACATGAACCAGCCCCAGACGCAGCTGCAGCCTCA   |
| TET2 p.R1359H  | TTCGCATTCACACACACTTTTATTTTTCAGATTGAATATGAACA<br>CAGAGCACCAGAGTGCC[G/A]TCTGGGTCTGAAGGAAGGCCGT<br>CCATTCTCAGGGGTCACTGCATGTTTGGACTTCTGTGCT  |
| SRCAP p.L1779P | CCAGTGGGCCCAGCCCCAGCTCACACGCTGACTTTGGCTCCAG<br>CATCGTCATCTGCTTCAC[T/C]CCTGGCCCCAGCTTCAGTGCAG<br>AACTGACCTTGAGCCCTGCCCCAGTTCCTACCCTGGGC   |
| FAT1 p.Q249K   | CTGTCCAGTTCTGATGGTGACAATGTCACTGCTGTTATCACCG<br>GAGCACATTCATTGGCCT[G/T]TTCGATGTGCACCGTTAGCTTG<br>GCCATGCTGCTGATGCCACTGCTCCCATACAACTTCATG  |
