# Supplementary material
Source: PubMed Central journal article supplement (PMC7521140)
Supplement: NIHMS1602364-supplement-Figures.pdf [file NIHMS1602364-supplement-Figures.pdf]

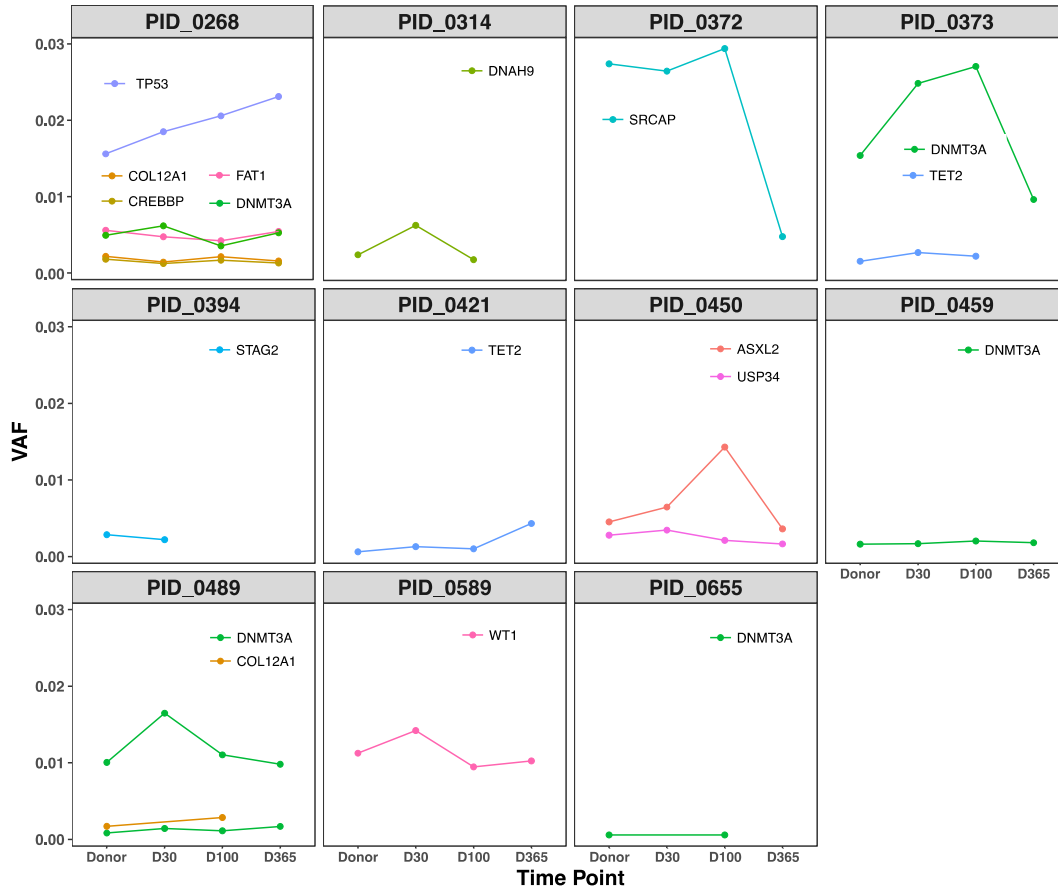

**Fig. S1. Engrafted donor mutations in recipients.** Dots connected by a line indicate that the same mutation was observed at multiple time points. A total of 19 mutations from 11 donors engrafted in the recipients, with 14 mutations persisting through 360 days (D360) post-HSCT in recipients. Four donors harbored more than one somatic mutation in these genes.

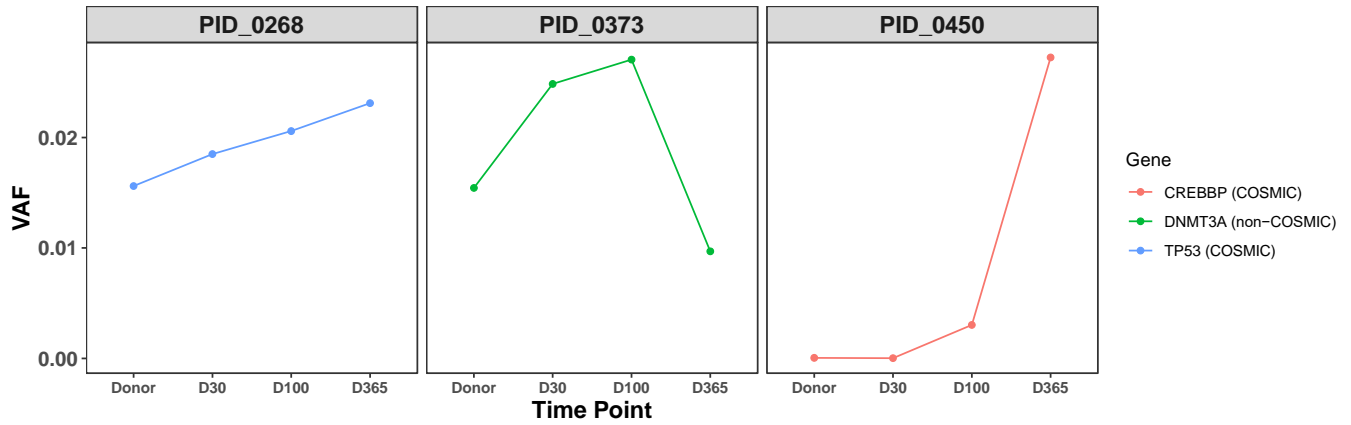

**Fig. S2. Clonal expansion of mutations reaching the threshold for CHIP ( $\geq 0.02$  VAF) in three patients after HSCT.** Engraftment of *DNMT3A* (PID\_0373) and *TP53* (PID\_0268) mutations was identified by ECS, whereas engraftment of the *CREBBP* (PID\_0450) mutation was identified by ddPCR.

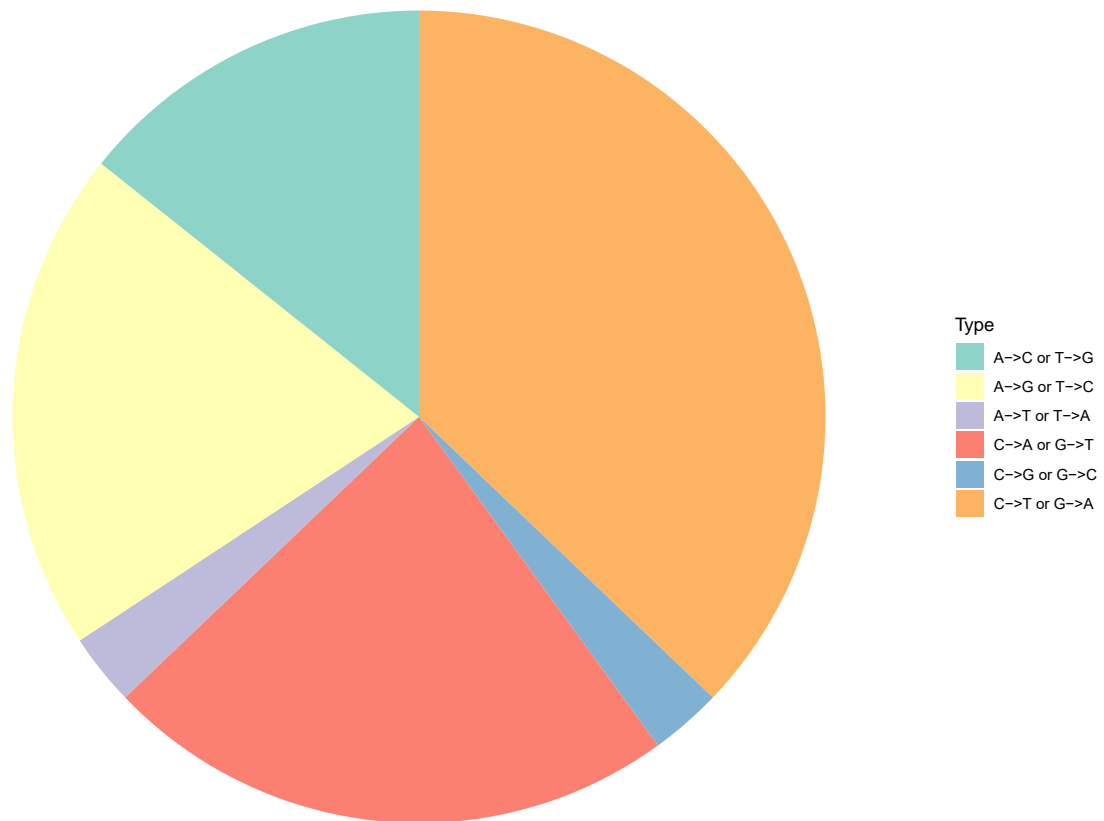

**Fig. S3. Types of somatic substitutions in recipients after HSCT.** The C→T/G→A transition (orange), consistent with age-related clonal hematopoiesis, was the most prevalent (14).

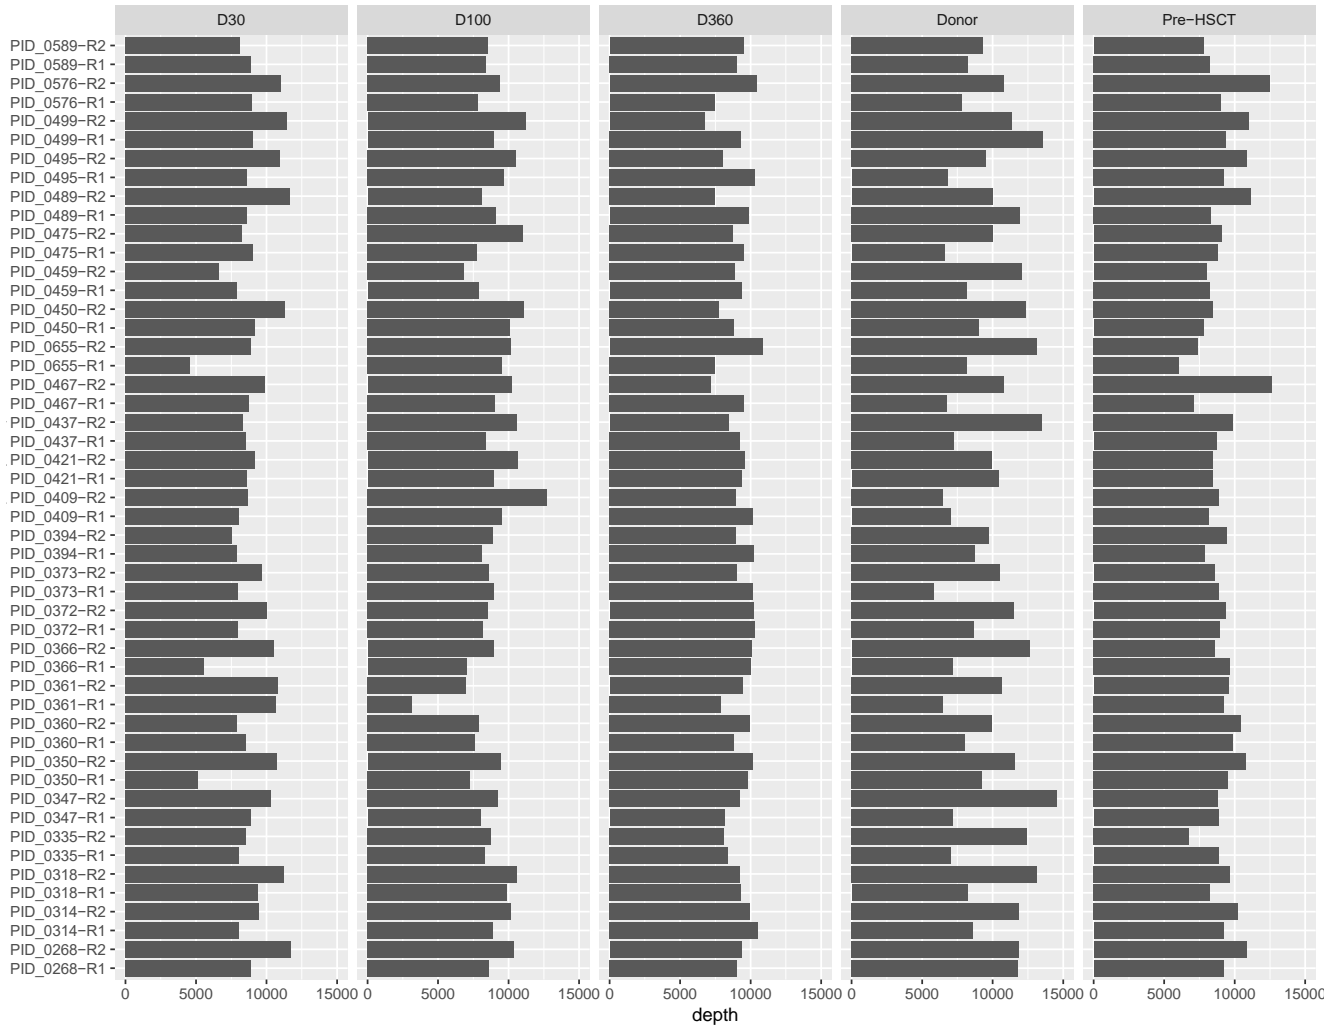

**Fig. S4. The sequencing depth of each ECS library at all time points.** There were no significant differences in sequencing depth (p-value >0.05, two-sided Wilcoxon rank-sum tests).

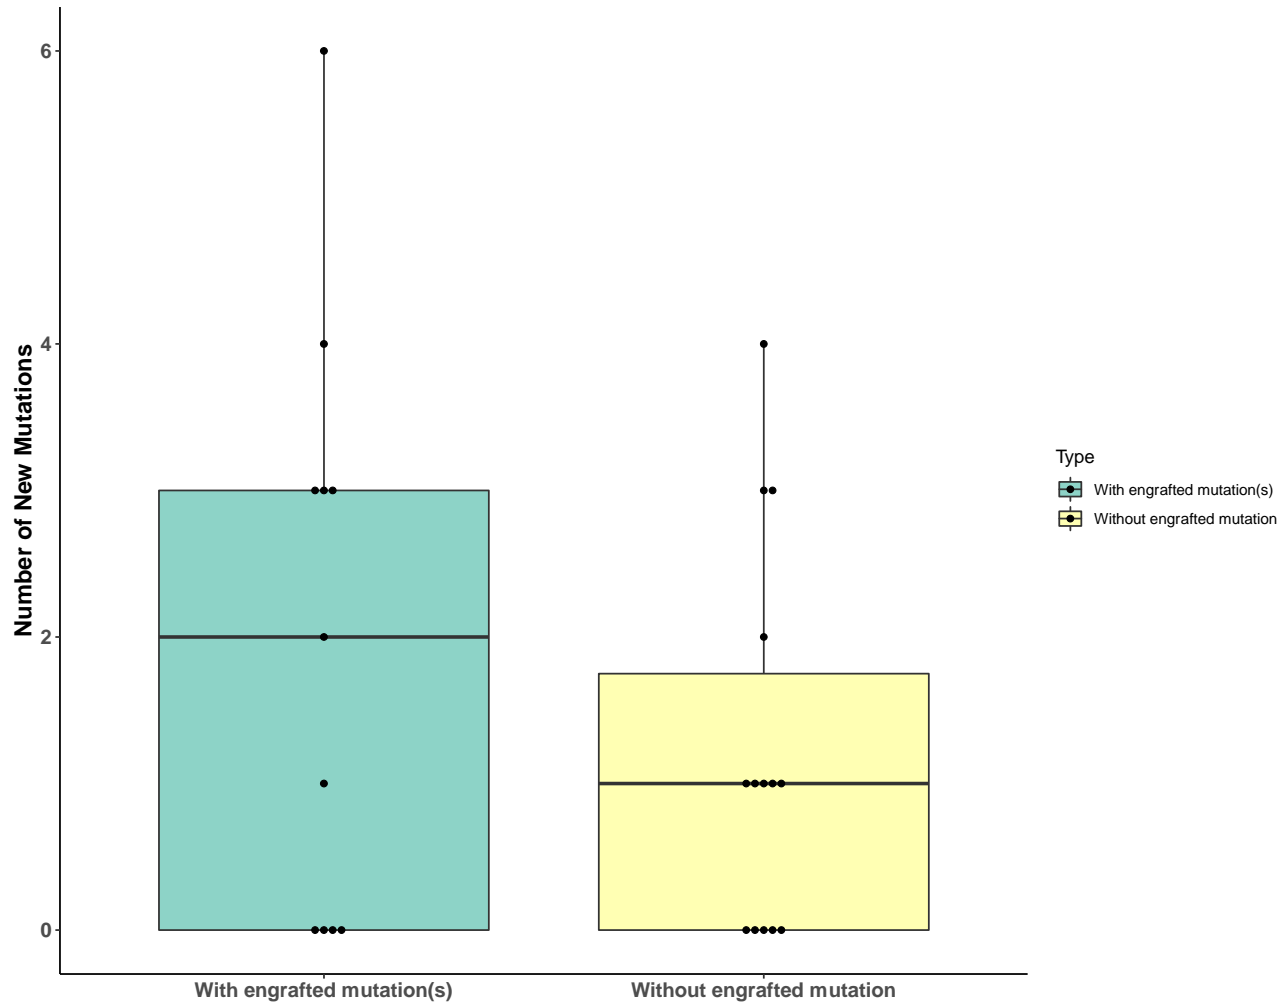

**Fig. S5. New mutations detected in recipients after HSCT.** There was no significant difference in the number of new mutations between recipients with engrafted donor-derived mutations and recipients without (p-value=0.44, two-sided Wilcoxon rank-sum test).

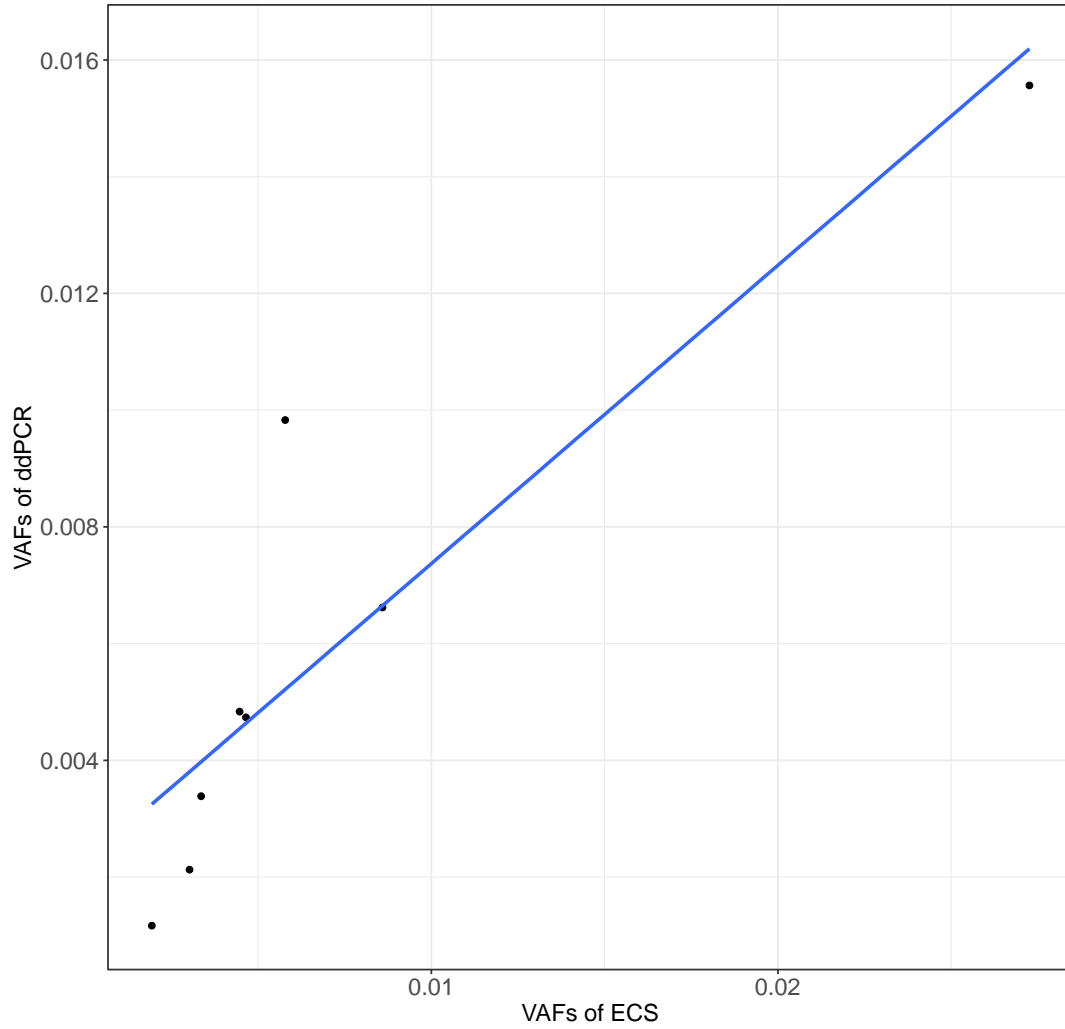

**Fig. S6. ECS calls validated by ddPCR.** Positive correlation with Pearson correlation coefficient = 0.9003, p-value = 0.002296.

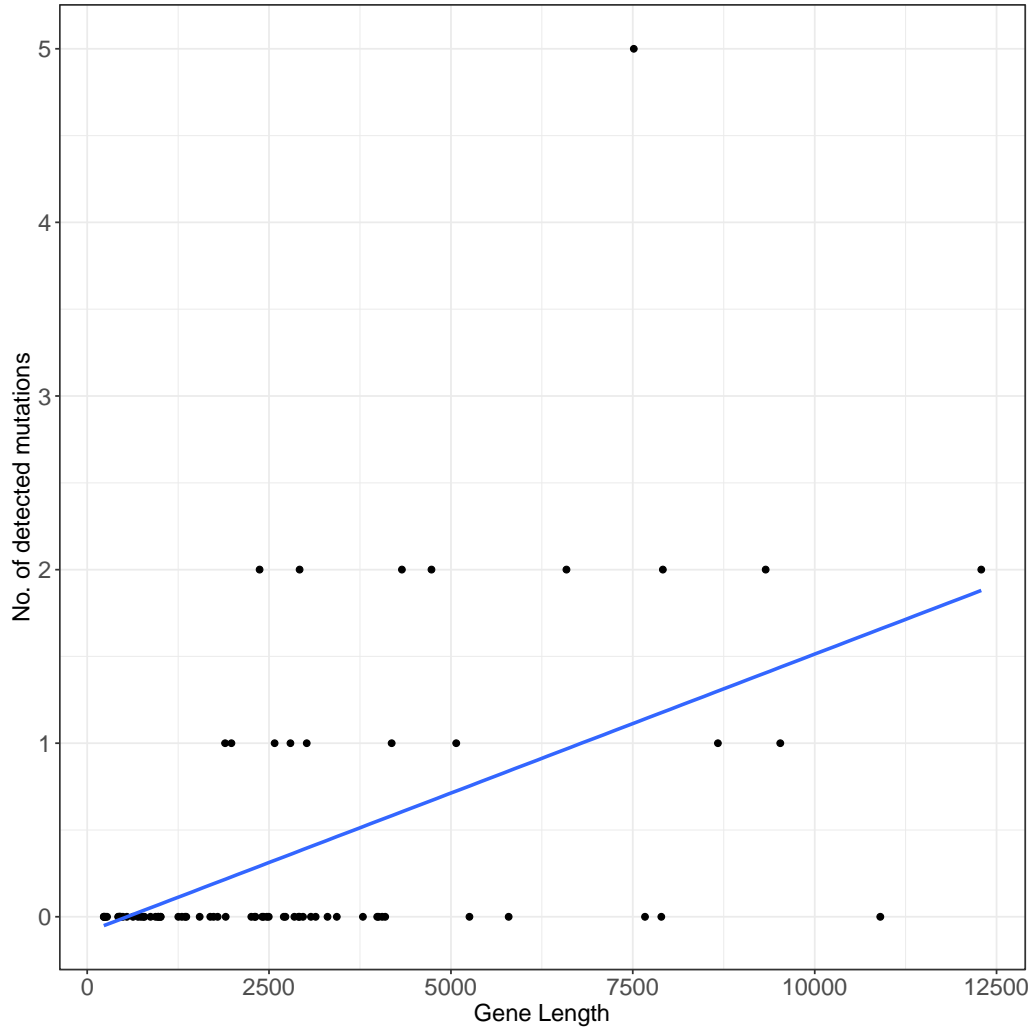

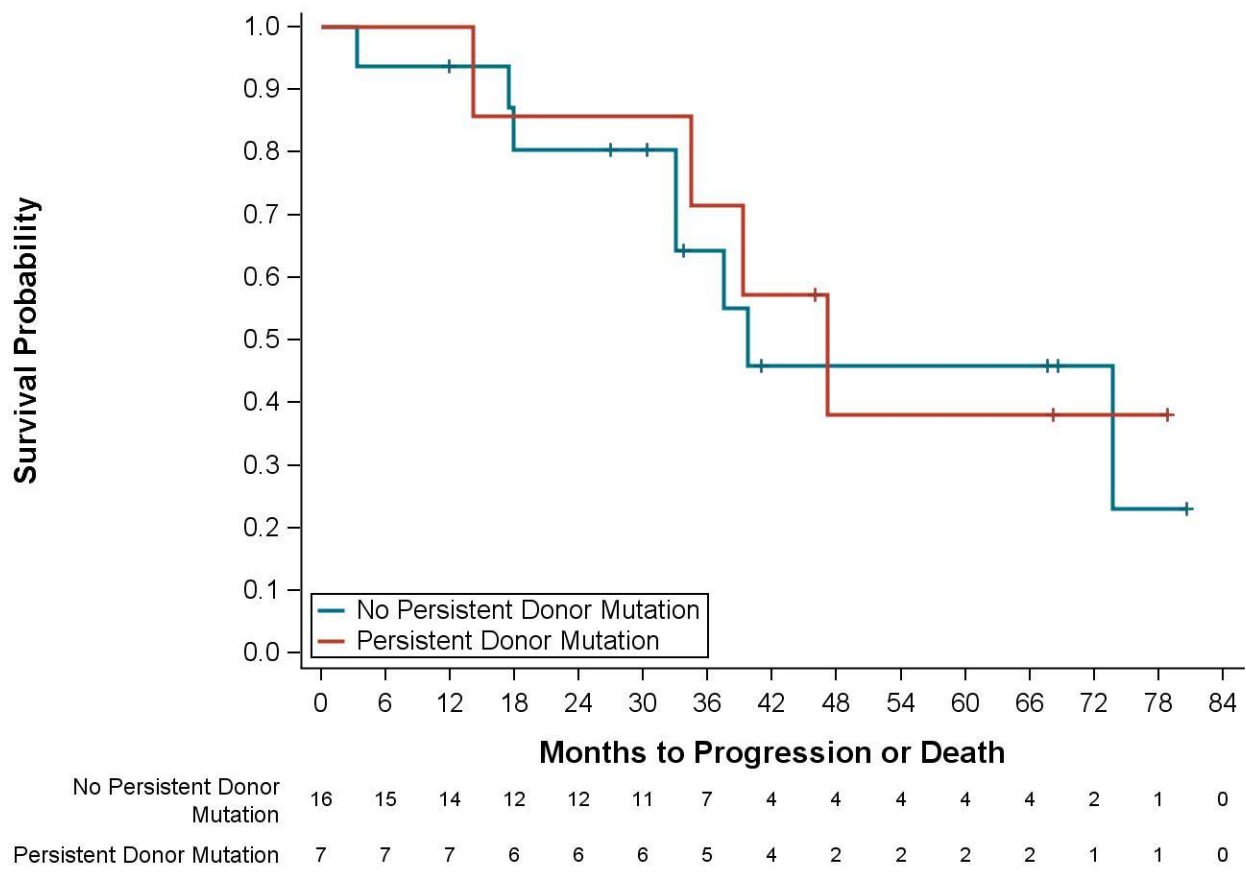

**Fig. S8. Leukemia-free survival of recipients with or without persistent engraftment of donor-derived mutations. n.s., p-value = 0.7636.**



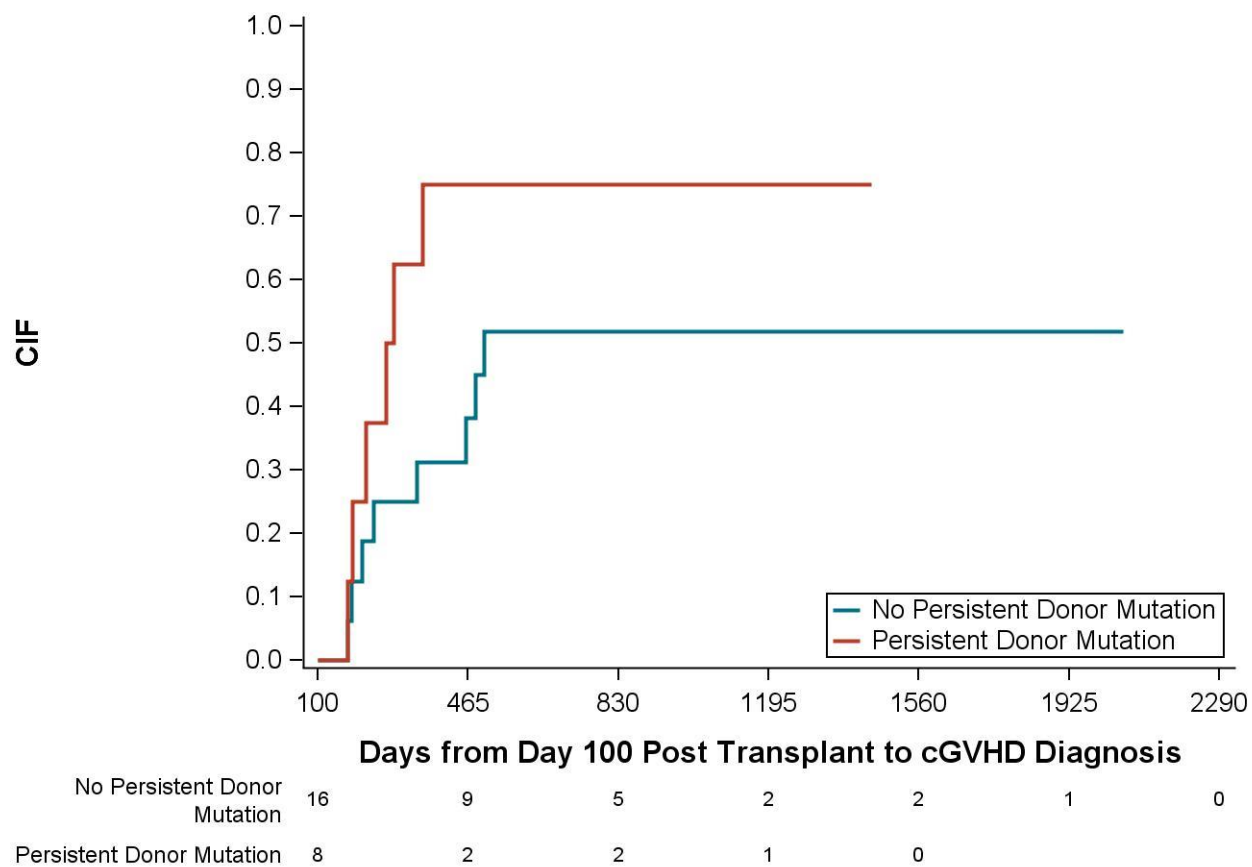

**Fig. S9. Cumulative incidence of chronic GvHD in recipients with or without persistent engraftment of donor-derived mutations. n.s., p-value = 0.1755.**
